# Supplementary material for: Micro-PIXE reveals cisplatin uptake followed by Fe accumulation in U87 cells
Source: Royal Society of Chemistry journal article supplement (doi:10.1039/d4ja00179f), 2024-01-01
Supplement: d4ja00179f1.pdf [file d4ja00179f1.pdf]

## Supplementary material of Micro-PIXE reveals cisplatin uptake followed by Fe accumulation in U87 cells

Henrique Fonteles<sup>a,\*</sup>, T. S. Klippel<sup>a</sup>, Julia Marcolin<sup>b</sup>, Deiverti Bauer<sup>a</sup>, Daphne Torgo<sup>b</sup>, Laura Boose<sup>b</sup>, Karine Begnini<sup>b</sup>, Eduardo Filippi-Chiela<sup>c</sup>, Guido Lenz<sup>b</sup>, Johnny Ferraz Dias<sup>a</sup>, and Pedro Luis Grande<sup>a</sup>

<sup>a</sup>Laboratório de Implantação Iônica Instituto de Física, Universidade Federal do Rio Grande do Sul (UFRGS), Av. Bento Gonçalves 9500, CEP 91501-970, Porto Alegre, RS, Brazil

<sup>b</sup>Laboratório de Sinalização e Plasticidade Celular, Instituto de Biociências, Universidade Federal do Rio Grande do Sul (UFRGS)

<sup>c</sup>Experimental Research Center, Hospital de Clínicas de Porto Alegre, Center of Biotechnology, Universidade Federal do Rio Grande do Sul, Department of Morphological Sciences, Universidade Federal do Rio Grande do Sul, Porto Alegre, RS, Brazil

---

---

### 1. Raw Images of Micro-PIXE Maps

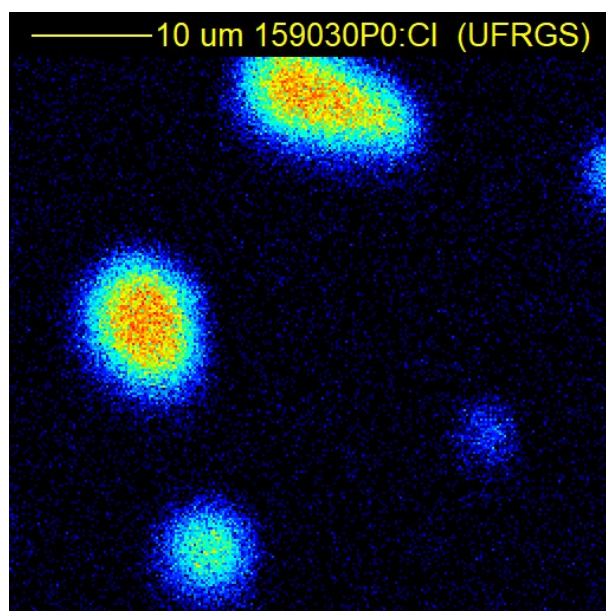

Figure 1: Elemental distribution of chlorine following a 24-hour exposure of cells to 10  $\mu$ M cisplatin. Raw Image.

---

\*Corresponding author: Henrique Fonteles, fonteleshenrique@gmail.com

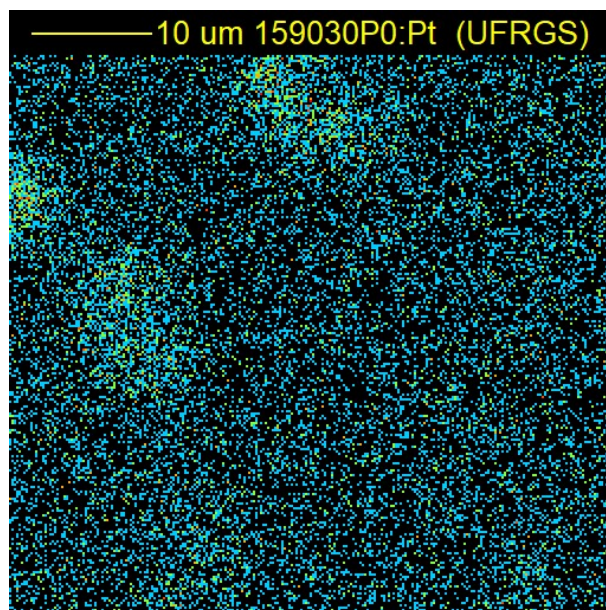

Figure 2: Elemental distribution of platinum following a 24-hour exposure of cells to 10  $\mu\text{M}$  cisplatin. Raw Image.

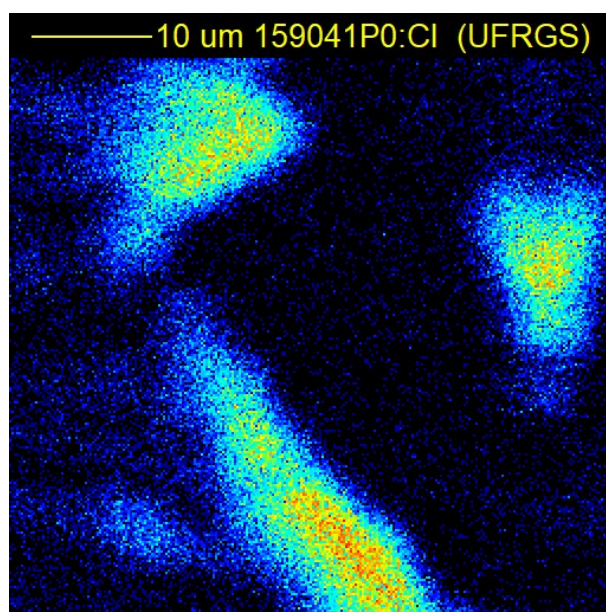

Figure 3: Elemental distribution of chlorine following a 24-hour exposure of cells to 20  $\mu\text{M}$  cisplatin. Raw Image.

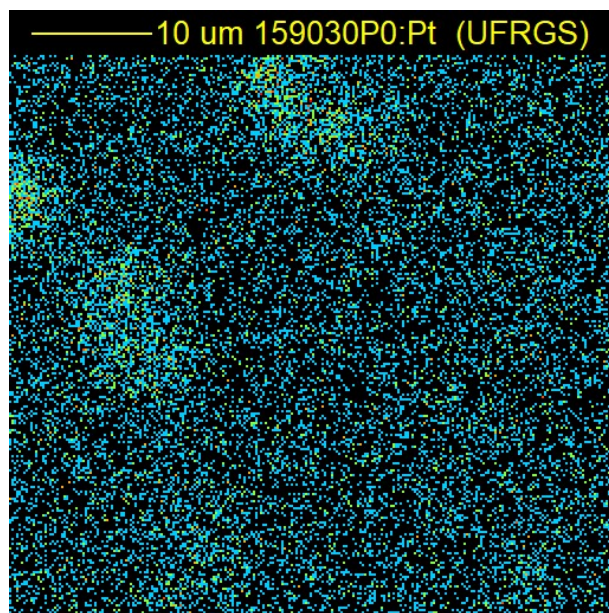

Figure 4: Elemental distribution of platinum following a 24-hour exposure of cells to 20  $\mu\text{M}$  cisplatin. Raw Image.

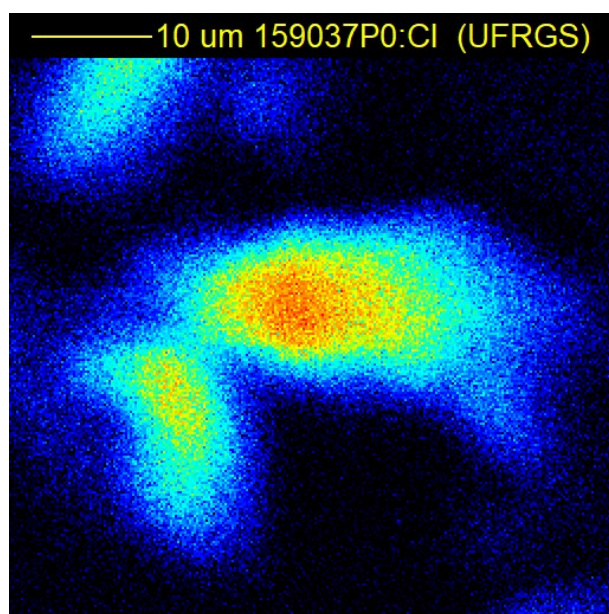

Figure 5: Elemental distribution of chlorine following a 24-hour exposure of cells to 100  $\mu\text{M}$  cisplatin. Raw Image.

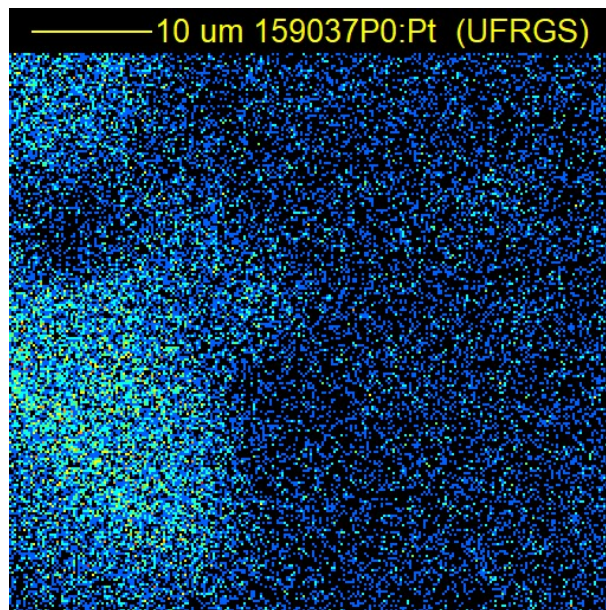

Figure 6: Elemental distribution of platinum following a 24-hour exposure of cells to 100  $\mu\text{M}$  cisplatin. Raw Image.

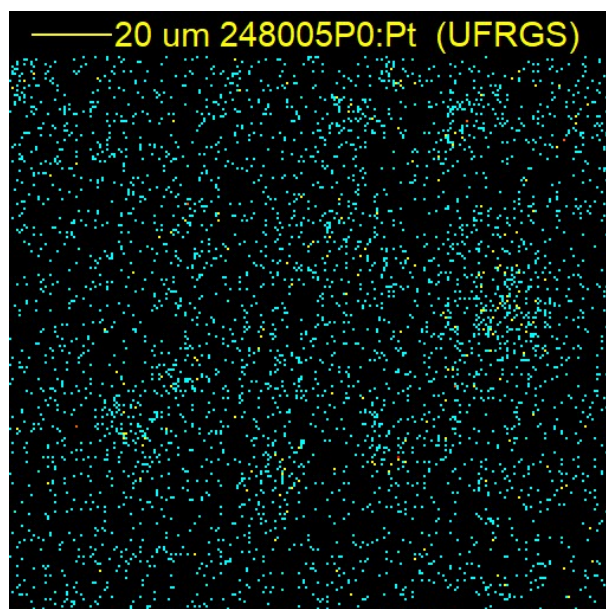

Figure 7: Elemental distribution of platinum following a 24-hour exposure of cells to 100  $\mu\text{M}$  cisplatin. Raw Image.
